# Supplementary material for: Differential Effects of a Full and Biased Ghrelin Receptor Agonist in a Mouse Kindling Model
Source: Int J Mol Sci. 2019 May 20;20(10):2480. doi: 10.3390/ijms20102480 (PMC6567032; doi:10.3390/ijms20102480)
Supplement: Supplementary file 1 [file ijms-20-02480-s001.pdf]

## Supplementary material

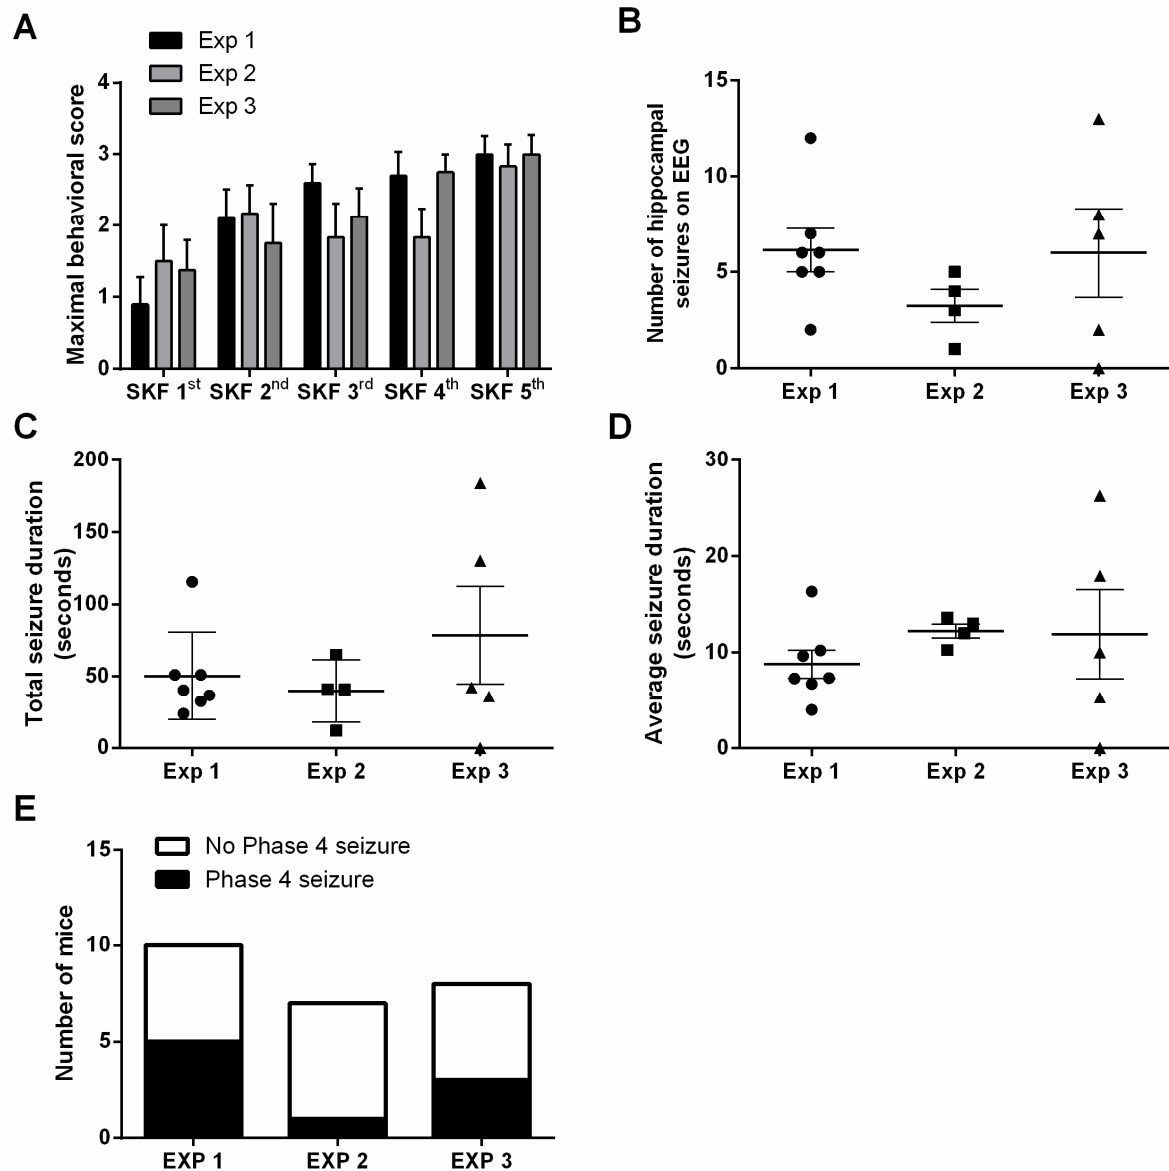

**Figure 1: Comparison of the tested parameters between control animals of the three experiments. A)** Maximal behavioral scores obtained by saline-treated control animals from the three experiments. Two-Way RM ANOVA (Interaction  $P > 0.05$ ,  $F(8, 84) = 0.9064$ ; Time  $P < 0.0001$ ,  $F(4, 84) = 8.408$ ; Treatment  $P > 0.05$ ,  $F(2, 21) = 0.3082$ ). **B)** The number of hippocampal seizures in saline-treated control animals from the three experiments. Kruskal-Wallis ( $P > 0.05$ ; Kruskal-Wallis statistic = 2.524). **C)** Total seizure duration in saline-treated control animals from the three experiments. Kruskal-Wallis ( $P > 0.05$ ; Kruskal-Wallis statistic = 0.2622). **D)** Average seizure duration in saline-treated control animals from the three experiments. Kruskal-Wallis ( $P > 0.05$ ; Kruskal-Wallis statistic = 2.575). **E)** Proportion of mice experiencing Phase IV seizures during the total kindling procedure Chi-square test ( $P > 0.05$ ; Chi-square 2.291). Data are presented as mean  $\pm$  SEM. EEG = electro-encephalography; SKF = SKF81297. Exp 1 = control animals from the first experiment (JMV-1843); Exp 2 = control animals from the second experiment (YIL781); Exp 3 = control animals from the third experiment (JMV-2959).

Number of hippocampal seizures on EEG: One-Way ANOVA,  $P > 0.05$ ; Total seizure duration: One-Way ANOVA,  $P > 0.05$ ; Average seizure duration: One-Way ANOVA,  $P > 0.05$ ; Proportion of mice experiencing Phase IV seizures: Fisher's exact test,  $P > 0.05$ ).
